# Supplementary material for: Modern psychometrics applied in rheumatology–A systematic review
Source: PubMed Central journal article supplement (PMC3517453; doi:10.1186/1471-2474-13-216), 2012-10-31
Supplement: 1471-2474-13-216-S1.pdf [file 1471-2474-13-216-S1.pdf]

# List of abbreviations

|       |                                         |
|-------|-----------------------------------------|
| 1-PLM | 1-parameter logistic model              |
| 2-PLM | 2-parameter logistic model              |
| 3-PLM | 3-parameter logistic model              |
| ADL   | Activities of daily living              |
| CAT   | Computerized adaptive testing           |
| CFA   | Confirmatory factor analysis            |
| CML   | Conditional maximum likelihood          |
| DIF   | Differential item functioning           |
| EAP   | Expected a posteriori estimator         |
| EFA   | Exploratory factor analysis             |
| GPCM  | Generalized partial credit model        |
| GRM   | Graded response model                   |
| IADL  | Instrumental activities of daily living |
| IRT   | Item response theory                    |
| MML   | Marginal maximum likelihood             |
| PCA   | Principal component analysis            |
| PCM   | Partial credit model                    |
| PRO   | Patient reported outcome                |
| QoL   | Quality of life                         |
| RSM   | Rating scale model                      |
| UML   | Unconditional maximum likelihood        |
| (W)ML | (Weighted) maximum likelihood           |

# General information

**First author** .....

**Publication year**

**Country / Countries of study execution** .....  
.....

**Design IRT analyses**  Cross-sectional  
 Longitudinal

**Disease condition(s)** .....

**Total N** .....

**Application**  PRO measure  
 Clinical measure / other

# Instrument

**Instrument examined**

.....

**Main measurement intention**

- QoL / Health Status
- Overall physical function (ADL, IADL, Mobility tasks)
- Specific functioning (e.g. hand function)
- Disease activity
- Pain
- Psychosocial construct (e.g. anxiety, depression)
- Other: .....

**Main goal of the study**

- Development/evaluation of new instrument
- Development/evaluation of alternate / short form version
- Evaluation of existing instrument
- Comparison of instruments
- Comparison of the psychometric properties of a single instrument in various patient groups
- Scoring of instrument
- Cross-calibration / equation of instruments
- Calibration / evaluation of item bank
- Development / evaluation of CAT
- Cross-cultural validation
- Other: .....

**Applied IRT model**

**General**

**Specific**

1-PLM / Rasch

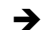

Dichotomous

Polytomous

RSM

PCM

Other: .....

Not specified

2-PLM

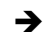

Dichotomous

Polytomous

GRM

GPCM

Other: .....

Not specified

3-PLM

Mokken

Not specified

**Applied IRT software**

Bigsteps / Winsteps

RUMM

Multilog / Bilog

Parscale

MPlus

MSP

SAS

GLAMM / STATA

Conquest

Other: .....

Not specified

**Performed analyses**

- Unidimensionality
- Local independence
- Item fit
- Person fit
- Person/item/subscale separation and/or reliability
- Measurement precision (e.g. item/test information)
- DIF
- Rating scale analysis (response category ordering/item thresholds)
- Hierarchical ordering and/or distribution of persons/items
- Cross-calibration / equation
- Other: .....

# Quality appraisal

**Sample size** .....

**Number of items** .....

**Model description**  Yes, with model specification (e.g. Rasch-PCM, Rasch dichotomous)  
 Yes, without model specification  
 No

**Model choice adequately explained (e.g., number or type of response categories / common discrimination parameter)**  Yes  
 No

**Applied IRT software is cited**  Yes  
 No

**Various IRT models were tested**  Yes  
 No

**Assumptions adequately tested**  Unidimensionality →  IRT residuals  
 EFA / PCA of item scores  
 CFA of item scores  
 PCA of residuals  
 IRT statistics (e.g. model fit)  
 Other: .....

- Local independence →  IRT residuals
- Residual covariation CFA (Modification indices)
- Residual covariation PCA / EFA
- Other: .....

- Fit →  Overall fit statistics
- Item fit statistics
- Person fit statistics

- DIF →  Age
- Gender
- Disease duration
- Countries / cultures
- Diseases
- Time points
- Other: .....

**Item parameter estimation method**

- JML
- UML
- MML
- CML
- Bayesian
- Not specified

**Person/population parameter estimation method**

- (W)ML
- Bayesian (e.g. EAP)
- Not specified

**Important flaws:**

.....

.....
